# Supplementary material for: Observation of the enhancement in enantioselectivity with conversion for the aziridination of styrene using copper bis(oxazoline) complexesElectronic supplementary information (ESI) available: further data. See http://www.rsc.org/suppdata/cc/b3/b309507j/
Source: Royal Society of Chemistry journal article supplement (doi:10.1039/b309507j), 2003-01-01
Supplement: b309507j.doc [file b309507j.doc]

**Supplementary Data**

# Observation of the enhancement in enantioselectivity with conversion for the aziridination of styrene using copper bis(oxazoline) complexes

John Gullick, Sophia Taylor, Darragh Ryan, Paul McMorn, Mike Coogan, Donald Bethell, Philip C. Bulman Page, Frederick E. Hancock, Frank King and Graham J. Hutchings

**Table S1** Effect of nitrene donor/sulfonamide on the formation of aziridinea

| Nitrene donor | aziridine | | | | |
| --- | --- | --- | --- | --- | --- |
| NNs | |  | NTs | |
|  | yield (%) | ee (%) |  | yield (%) | ee(%) |
| PhI=NTs | - | - |  | 78 | 76 |
| PhI=NTs + NsNH2b | 11 | 75 |  | 45 | 34 |
| PhI=NNsc | 78 | 85 |  | - | - |
| PhI=NNs + TsNH2d | 59 | 91 |  | 5 | 33 |

a reaction conditions : CuHY (0.3 g), bis(oxazoline) (0.03 g, 1.2 mmol), CH3CN (2.5 ml) pre-stirred for 15 min at 25 oC, styrene (111 l, 0.97 mmol) added, followed by PhI=NTs (0.543 g)

b as a) except NsNH2 (0.1677 g) added together with PhI=NTs

c as a) except PhI=NNs (0.5881 g) added in place of PhI=NTs

d as c) except TsNH2 (0.1420 g) added with PhI=NNs

**Figure S1** Effect of reaction time on yield and ee of (*R*)-aziridine [styrene (1 mmol) reacted with CuHY (0.3 g) or Cu(OTf)2 (0.015 g), nitrene donor (1.5 mmol) with (*R*,*R*)-bis(oxazoline) **1** in CH3CN at 25 oC]. (a) CuHY with PhI=NTs; (b) Cu(OTf)2 with PhI=NTs;  aziridine yield,  ee.

**Figure S2** Reaction of chiral aziridine with nitrene donor. a) reactions using (*R*)-(*N*)-(*p*-tosylsulfonyl)-2-phenyl aziridine (ee 76%); b) reactions using (*R*)-*N*-(*p*-nosylsulfonyl)-2-phenyl aziridine (ee 85%). Key : 1) aziridine before reaction; 2) 1 stirred with CuHY + **1**; 3) as 2) but PhI=NTs also added; 4) 1 stirred with Cu(OTf)2 + **1**; 5) as 4) but PhI=NTs also added; 6) as 2) but with PhI=NNs also added; 7) as 4) but with PhI=NNs added to reaction. [conditions : aziridine (1 mmol) stirred in CH3CN (2.5 ml), 25 oC, 24 h, with catalyst [CuHY (0.3 g) or Cu(OTf)2 (0.015 mmol)], **1** (0.07 mmol), nitrene donor (1.5 mmol)]. Shaded = yield (%), clear = ee (%).

**Figure S3** Reaction of racemic aziridine with (*R*,*R*)-bis(oxazoline)/CuHY in the presence of the nitrene donor.  ee (*R*) and  % aziridine loss for *N*-(*p*-tosylfulfonyl)-2-phenyl aziridine reacted with PhI=NTs;  ee (*R*) and  % aziridine loss for *N*-(*p*-nosylsulfonyl)-2-phenyl aziridine reacted with PhI=NNs. [conditions : aziridine (1 mmol) reacted with nitrene donor (1.5 mmol) in CH3CN (2.5 ml) for 24 h.
